# Supplementary material for: Is plasma vitamin C an appropriate biomarker of vitamin C intake? A systematic review and meta-analysis
Source: Springer Nature journal article supplement (doi:10.1186/1475-2891-6-41), 2007-11-13
Supplement: Additional file 1 [file 1475-2891-6-41-s1.pdf]

### Additional file 1 - Description of studies included in meta-analysis

| Study                                  | Setting                                  | Sample size & characteristic       | Study length /mo. | Diet success rate                   | Blood / Success rate | No. of FFQ food items | Dietary tool         |
|----------------------------------------|------------------------------------------|------------------------------------|-------------------|-------------------------------------|----------------------|-----------------------|----------------------|
| 1. Bingham et al., 1995 [12]           | General Practitioners, Cambridge, UK     | 160 women, aged 50-65 y            | 12                | 100%                                | 100%                 | —                     | 16d WR               |
| 2. Bingham et al., 1997 [13]           | Cambridge UK                             | 127 women, aged 50-65 y            | 12                | 79% for FFQ, 91% for DR, 46% for WR | ≈80%                 | 116                   | FFQ, WR, DR, Diary   |
| 3. Block et al., 2001 [33]             | Participants of CLUE II study, USA       | 116 men, aged 35-72 y              | NR                | NR                                  | NR                   | 60                    | FFQ                  |
| 4. Boeing et al., 1997 [34]            | EPIC, Germany                            | 43 men, 49 women, aged 35-64 y     | 12                | 75%                                 | 75%                  | 158                   | FFQ, 12 DR           |
| 5. Bolton-Smith et al., 1991 [28]      | General Practitioners, Glasgow, UK       | 79 non-smoker men, aged 46.0 (2.8) | NR                | 64.5%                               | 64.5%                | 65                    | FFQ                  |
| 6. Chiplonkar et al., 2002 [35]        | Healthy individuals, India               | 214 men, 108 women, aged 20-50     | 1                 | 64.4%                               | 64.4%                | 278                   | FFQ,                 |
| 7. Costa de Carvalho et al., 1996 [36] | Free living, France                      | 157 male, 180 female, aged 30-62y  | 1985-1986         | 35%                                 | 100%                 | —                     | 7 day food record    |
| 8. Cooney et al., 1995 [37]            | Free living, Hawaii                      | 13 men, 14 women, aged 31-63 y     | 12                | NR                                  | 100%                 | 250                   | DHQ                  |
| 9. Drewnowski et al., 1997 [15]        | ISTNA survey, Paris                      | 361 men, 476 women, aged >18y      | 6                 | 100%                                | 100%                 | 73                    | DH                   |
| 10. EPIC group of Spain, 1997 [38]     | EPIC                                     | 32 men, 40 women, aged 35-60 y     | 12                | ≈ 80%                               | 79%                  | —                     | DH, 12 DRs           |
| 11. Faruque et al., 1995 [39]          | Students of Dhaka University, Bangladesh | 44 men, aged 22-28y                | NR                | 100%                                | 100%                 | —                     | 7 day food frequency |
| 12. Hudiburgh et al., 1979 [40]        | College women, USA                       | 15 women, aged 19-37y              | ≈ 1               | 100%                                | 100%                 | —                     | 7 day food record    |

Additional file 1 (continued)

|                                   |                                                |                                        |           |      |      |     |                      |
|-----------------------------------|------------------------------------------------|----------------------------------------|-----------|------|------|-----|----------------------|
| 13. Jacques et al., 1993 [41]     | Cataract case-control, USA                     | 57 men, 82 women, 40-83y               | NR        | 100% | 100% | 116 | FFQ                  |
| 14. Katsouyanni et al., 1997 [42] | EPIC, Greek component, primary school teachers | 42 men, 38 women, aged 25-67y          | 12        | 82%  | 55%  | 190 | FFQ, 12 DRs          |
| 15. Lori et al., 1998 [43]        | NHANES II, USA                                 | 8456 men and women, aged 30-74y        | NA        | 91%  | 91%  | NR  | DR                   |
| 16. Malekshah et al., 2006 [44]   | Esophageal cancer cohort, Northern Iran        | 51 men, 80 women aged 35-65y           | 12        | 92%  | 92%  | 150 | FFQ, 12 DRs          |
| 17. McKeowen et al., 2001 [45]    | EPIC, Norfolk UK cohort                        | 48 men, 70 women aged 45-74y           | 9         | 75%  | 69%  | 130 | FFQ, 7 day diary, DR |
| 18. Porrini et al., 1995 [46]     | Students and technicians, Italy                | 38 men, women, mean age 27.1 (6.3)     | 8 days    | 86%  | 72%  | 93  | FFQ, 7 day WR        |
| 19. Palli et al., 1999 [47]       | Healthy control of a case-control study, Italy | 553 men, 392 women, aged 30-75y        | 1985-1988 | 100% | 79%  | 181 | FFQ                  |
| 20. Riemersma et al., 2000 [48]   | Control group of a case-control study, UK      | 177 men, mean age 53.4 (0.5)           | 1992-1994 | 97%  | 97%  | NR  | FFQ                  |
| 21. Rousseau et al. 2004 [49]     | Athletes and sedentary individuals, France     | Athletes; 84 Men, mean age 26.8 (6.8)  | 8 days    | 88%  | 100% | —   | 7 day food record    |
| 22. Schroder et al., 2001 [50]    | Free living, North-eastern Spain               | 44 men and women, mean age 30.7 (10.4) | ≈2        | 100% | 100% | 157 | FFQ, 72-hr DR        |
| 23. Simon et al., 2001 [2]        | NH2MS, USA                                     | 8453 men and women age 30-75           | 1976-1980 | NR   | NR   | —   | DR                   |
| 24. Sinha et al., 1992 [51]       | Free living, Maryland USA                      | 68 men, aged 30-59 y                   | NR        | 100% | 100% | 60  | FFQ                  |

Additional file 1 (continued)

|                                 |                                                   |                                                                                                                        |                 |      |      |    |                   |
|---------------------------------|---------------------------------------------------|------------------------------------------------------------------------------------------------------------------------|-----------------|------|------|----|-------------------|
| 25. Tugane et al., 1998<br>[52] | Stomach cancer<br>cross sectional<br>study, Japan | 621 men, aged 40-<br>49 y                                                                                              | 1 month         | 98%  | 96%  | 34 | FFQ, 21 day<br>WR |
| 26. Wright et al., 1995<br>[53] | Free living,<br>Norway                            | 41 adult male<br>32 elderly male<br>42 adult female<br>42 adult female<br>Adult age: 20-64y<br>Elderly age: 68-<br>73y | 1989 to<br>1991 | 100% | 100% | —  | Weight<br>record  |

NR not reported NA not available

DH dietary history
